# Supplementary material
Source: HighWire-hosted journal article supplement (https://bmjopen.bmj.com/content/9/6/e028051)
Supplement: inline-supplementary-material-1 [file inline-supplementary-material-1.pdf]

Supplemental Table 1. General Information of Uncertain Discharge Failure Patients

| Uncertain Discharge Failure Patients (N=102,787)                                                                                         |             |
|------------------------------------------------------------------------------------------------------------------------------------------|-------------|
| a. Category of Uncertain Discharge Failures (N, %)                                                                                       |             |
| 1) patients who had neither subsequent ED nor clinical visits                                                                            | 84,049 (82) |
| 2) patients had no subsequent ED visits and their clinic visits were longer than one year from the index ED visit;                       | 1,398 (1.4) |
| 3) patients ED returns and clinical visits fell on the same day;                                                                         | 299 (0.3)   |
| 4) patients had subsequent clinical visits earlier than ED returns and their ED returns were within 30-days from the index ED discharge; | 2,295 (2.2) |
| 5) patients had ED returns earlier than subsequent clinical visits and their ED utilizations considered emergent;                        | 9,640 (9.4) |
| 6) patients had ED returns beyond 30-days from the index ED discharge and their ED visits were earlier than their clinical visits        | 5,106 (5)   |
| b. Patient General Characteristics                                                                                                       |             |
| Gender (Male)---yes, n (%)                                                                                                               | 50,830 (49) |
| Race --- n (%)                                                                                                                           |             |
| None-Hispanic Caucasian                                                                                                                  | 33,100 (32) |
| Others                                                                                                                                   | 69,687 (68) |
| Homeless --- yes, n (%)                                                                                                                  | 4,992 (4.9) |
| Chronic Disease Conditions --- yes, n (%)                                                                                                | 43,435 (42) |
| No Insurance --- n (%)                                                                                                                   | 52,049 (51) |
| Primary Care Physician Assignment --- yes, n (%)                                                                                         | 71,182 (69) |
| ESI (4-5) low level of acuity --- yes, n (%)                                                                                             | 21,664 (21) |
